# Supplementary material
Source: publisher figshare collection journal article supplement (https://acs.figshare.com/ndownloader/files/4189312)
Supplement: Supplementary file 1 [file 4189312]

# Ethylene Homopolymerization Kinetics with a Constrained Geometry Catalyst in a Solution Reactor

*Saeid Mehdiabadi<sup>†</sup> and João B.P. Soares<sup>\*</sup>*

Department of Chemical Engineering, University of Waterloo, Waterloo, Ontario, Canada N2L

3G2

## Appendix A

The concentration of complexed active sites given by Equation (6) is rewritten below as Equation (A-1),

$$[P^* \cdot M] = \frac{k_f [M] C_t}{k_r + k_f [M]} \quad (\text{A-1})$$

or,

$$[P^* \cdot M] = \frac{K [M] C_t}{1 + K [M]} \quad (\text{A-2})$$

The propagation rate is given by,

$$R_p = k_p [P^* \cdot M] [M] \quad (\text{A-3})$$

Substituting Equation (A-2) in (A-3) gives,

$$R_p = \frac{k_p C_t K [M]^2}{1 + K [M]} \quad (\text{A-4})$$

Catalyst sites are assumed to decay according to the second order model given below,

$$\frac{dC_t}{dt} = -k_d C_t^2 \quad (\text{A-5})$$

Integration of Equation (A-5) yields,

$$\frac{1}{C_t} = \frac{1}{C_0} + k_d t \quad (\text{A-6})$$

Rearranging,

$$C_t = \frac{C_0}{1 + k_d C_0 t} \quad (\text{A-7})$$

Substituting Equation (A-7) in (A-4), we get,

$$R_p = \frac{k_p C_0 K [M]^2}{(1 + K [M])(1 + k_d C_0 t)} \quad (\text{A-8})$$

The molar balance for monomer in a semi-batch reactor is given by,

$$\frac{d[M]}{dt} = \frac{F_{M,in}}{V_R} - R_p \quad (\text{A-9})$$

Since monomer concentration is kept constant, it can be concluded that,

$$F_{M,in} = R_p V_R \quad (\text{A-10})$$

Substituting Equation (A-8) in (A-10) leads to the final equation for monomer uptake rate,

$$F_{M,in} = \frac{k_p K V_R C_0 [M]^2}{(1 + K [M])(1 + k_d C_0 t)} \quad (\text{A-11})$$

## Appendix B

Taking Laplace transform of Equations (19) and (20) gives

$$sC_t(s) - C_0 = -(k_{dth} + k'_d)C_t(s) + k'_a C_d(s) \quad (\text{B-1})$$

$$sC_d(s) = -k'_a C_d(s) + k'_d C_t(s) \quad (\text{B-2})$$

Rearranging Equation (B-2),

$$C_d(s) = \frac{k'_d C_t(s)}{(s + k'_a)} \quad (\text{B-3})$$

and then substituting Equation (B-3) into Equation (B-1) yields,

$$C_t(s) = \frac{C_0(s + k'_a)}{(s + k_{dth} + k'_d)(s + k'_a) - k'_d k'_a} \quad (\text{B-4})$$

The theory of partial fractions enables us to write Equation (B-4) as,

$$C_t(s) = \frac{C_0(s_1 + k'_a)}{(s_1 - s_2)(s - s_1)} - \frac{C_0(s_2 + k'_a)}{(s_1 - s_2)(s - s_2)} \quad (\text{B-5})$$

where  $s_1$  and  $s_2$  are constants defined, previously, in Equations (22) and (23),

Taking the inverse Laplace transform of Equation (B-5) gives the solution for the concentration of active sites in the time domain,

$$C_t = \frac{C_0}{(s_1 - s_2)} \left[ (s_1 + k'_a) e^{s_1 t} - (s_2 + k'_a) e^{s_2 t} \right] \quad (\text{B-6})$$
